# Supplementary material for: Mortality Among Parkinson’s Disease Patients Treated With Pimavanserin or Atypical Antipsychotics: An Observational Study in Medicare Beneficiaries
Source: Atypon-hosted journal article supplement (doi:10.1176/appi.ajp.21090876), 2022-06-15
Supplement: appi.ajp.2021.21090876.ds001.pdf [file appi.ajp.2021.21090876.ds001.pdf]

### Supplementary Statistical Methods: Propensity Scores

We used propensity score (PS, the probability of receiving the actual treatment) methods<sup>1</sup> to account for baseline differences in characteristics between AA- and pimavanserin-treated patients. In this study, the PS for an individual was calculated using a logistic regression, modeling the probability of receiving pimavanserin versus AAs conditional on the baseline characteristics shown in Supplement Table 1.

In this study, we balanced the baseline characteristics using inverse probability of treatment weighting (IPTW).<sup>2</sup> With average-treatment-effect-on-the-treated (ATT) weighting, we weighted the AA treatment cohort to have baseline characteristics mirroring the pimavanserin cohort. Specifically, the pimavanserin-treated patients received a weight of 1 and AA users received a weight of PS/(1-PS). We evaluated the appropriateness of the PS model and weighting by inspection of the distributions of PSs and weights in the two groups.

**TABLE S1. Baseline characteristics of patients in the sample (complete listing). Shading indicates a standardized mean difference > 0.10.**

| Characteristic                    | Pimavanserin<br>(N = 3,227) | Atypical Antipsychotics       |                                          |                                          |                                          |
|-----------------------------------|-----------------------------|-------------------------------|------------------------------------------|------------------------------------------|------------------------------------------|
|                                   |                             | Before Weighting (N = 18,448) |                                          | After Weighting (N = 3,251) <sup>a</sup> |                                          |
|                                   | % of Eligible Patients      | % of Eligible Patients        | Std. Mean Diff. (vs Pimavanserin Cohort) | % of Eligible Patients                   | Std. Mean Diff. (vs Pimavanserin Cohort) |
| <b>Eligible Population</b>        | <b>3,227</b>                | <b>18,442</b>                 |                                          | <b>3,251</b>                             |                                          |
| Age (Mean)                        | 77.9                        | 78.9                          | 0.15                                     | 77.8                                     | 0.01                                     |
| Male                              | 55.4%                       | 55.3%                         | 0.00                                     | 55.7%                                    | 0.01                                     |
| Reason for Entrance into Medicare |                             |                               |                                          |                                          |                                          |
| <i>Aged without ESRD</i>          | 85.3%                       | 86.4%                         | 0.03                                     | 85.3%                                    | 0.00                                     |
| <i>Disabled without ESRD</i>      | 14.7%                       | 13.6%                         | 0.03                                     | 14.7%                                    | 0.00                                     |
| Race                              |                             |                               |                                          |                                          |                                          |
| <i>White</i>                      | 88.7%                       | 89.1%                         | 0.01                                     | 88.9%                                    | 0.01                                     |
| <i>Black</i>                      | 4.3%                        | 3.8%                          | 0.03                                     | 4.3%                                     | 0.00                                     |
| <i>Other</i>                      | 7.0%                        | 7.1%                          | 0.00                                     | 6.8%                                     | 0.01                                     |
| Regions                           |                             |                               |                                          |                                          |                                          |
| <i>West</i>                       | 19.0%                       | 18.5%                         | 0.01                                     | 18.6%                                    | 0.01                                     |
| <i>Northeast</i>                  | 19.7%                       | 20.9%                         | 0.03                                     | 19.6%                                    | 0.00                                     |

|                                                |       |       |      |       |      |
|------------------------------------------------|-------|-------|------|-------|------|
| <i>Midwest</i>                                 | 18·4% | 22·0% | 0·09 | 18·3% | 0·00 |
| <i>Other</i>                                   | 43·0% | 38·5% | 0·09 | 43·4% | 0·01 |
| Low Income Subsidy (LIS) <sup>b</sup>          | 24·6% | 26·5% | 0·04 | 24·5% | 0·00 |
| Area Deprivation Index (ADI) <sup>c</sup>      |       |       |      |       |      |
| <i>Missing</i>                                 | 2·6%  | 3·0%  | 0·02 | 2·6%  | 0·00 |
| <i>Low ADI</i>                                 | 62·2% | 61·0% | 0·02 | 61·9% | 0·01 |
| <i>High ADI</i>                                | 35·2% | 36·0% | 0·02 | 35·5% | 0·01 |
| Prescriber Specialty                           |       |       |      |       |      |
| <i>Neurology</i>                               | 71·5% | 38·3% | 0·71 | 71·9% | 0·01 |
| <i>Psychiatry</i>                              | 3·0%  | 8·2%  | 0·23 | 2·9%  | 0·01 |
| <i>Primary Care</i>                            | 24·6% | 51·0% | 0·57 | 24·3% | 0·01 |
| <i>Other</i>                                   | 0·9%  | 2·5%  | 0·12 | 0·9%  | 0·00 |
| <b>Long Term Care Facilities on Index Date</b> |       |       |      |       |      |
| In Nursing Home                                | 15·2% | 13·4% | 0·05 | 15·1% | 0·00 |
| <b>Medical Comorbidities</b>                   |       |       |      |       |      |
| <b><i>Neuropsychiatric Disorders</i></b>       |       |       |      |       |      |
| Bipolar Disorder                               | 1·7%  | 4·4%  | 0·16 | 1·7%  | 0·00 |
| Depressive Disorder                            | 42·1% | 48·6% | 0·13 | 41·6% | 0·01 |
| Anxiety                                        | 32·9% | 40·4% | 0·15 | 32·8% | 0·00 |
| Dementia                                       | 56·5% | 60·2% | 0·07 | 56·3% | 0·00 |
| Mild Cognitive Impairment                      | 12·7% | 12·2% | 0·01 | 12·8% | 0·00 |
| Post Traumatic Stress Disorder (PTSD)          | 0·5%  | 0·8%  | 0·03 | 0·5%  | 0·00 |
| Restless Leg Syndrome (RLS)                    | 9·2%  | 8·8%  | 0·01 | 9·3%  | 0·00 |
| <b><i>Cardiovascular</i></b>                   |       |       |      |       |      |
| Atrial Fibrillation                            | 16·0% | 20·7% | 0·12 | 15·9% | 0·00 |
| Hospitalized Myocardial Infarction             | 0·4%  | 1·1%  | 0·08 | 0·4%  | 0·00 |
| Coronary Revascularization                     | 9·2%  | 11·7% | 0·08 | 9·2%  | 0·00 |
| Congestive Heart Failure                       | 14·3% | 18·8% | 0·12 | 14·4% | 0·00 |
| Other Ischemic Heart Disease                   | 28·6% | 34·2% | 0·12 | 28·7% | 0·00 |
| Peripheral Vascular Disease                    | 32·5% | 34·9% | 0·05 | 32·4% | 0·00 |
| Hospitalized Stroke                            | 0·7%  | 1·5%  | 0·07 | 0·7%  | 0·00 |
| Hypertension                                   | 76·1% | 80·1% | 0·1  | 76·0% | 0·00 |
| Transient Ischemic Attack                      | 5·9%  | 7·8%  | 0·07 | 5·8%  | 0·00 |
| Other Cerebrovascular Disease                  | 19·5% | 24·7% | 0·12 | 19·3% | 0·00 |
| <b><i>General Medical Conditions</i></b>       |       |       |      |       |      |
| Alcohol Abuse                                  | 0·7%  | 1·9%  | 0·11 | 0·6%  | 0·01 |
| Anemia                                         | 35·2% | 37·9% | 0·06 | 35·2% | 0·00 |
| Chronic Liver Disease                          | 1·6%  | 2·1%  | 0·03 | 1·6%  | 0·00 |
| Chronic Obstructive Pulmonary Disease (COPD)   | 12·0% | 17·3% | 0·15 | 12·0% | 0·00 |

|                                                             |       |       |      |       |      |
|-------------------------------------------------------------|-------|-------|------|-------|------|
| Diabetes                                                    | 25·6% | 31·8% | 0·14 | 25·4% | 0·01 |
| Hypercholesterolemia                                        | 36·0% | 38·1% | 0·04 | 35·9% | 0·00 |
| Chronic Kidney Disease                                      | 17·0% | 20·4% | 0·09 | 16·8% | 0·00 |
| Kidney Failure-Acute                                        | 7·8%  | 10·5% | 0·09 | 8·0%  | 0·01 |
| Malignancy                                                  | 16·0% | 17·1% | 0·03 | 16·0% | 0·00 |
| Obesity                                                     | 11·4% | 13·8% | 0·07 | 11·5% | 0·00 |
| Rheumatic Disease                                           | 4·6%  | 5·0%  | 0·02 | 4·5%  | 0·00 |
| Nicotine Dependency                                         | 21·9% | 26·7% | 0·11 | 22·0% | 0·00 |
| Hospitalized Pneumonia                                      | 3·4%  | 4·9%  | 0·08 | 3·4%  | 0·00 |
| <b>Frailty-Related Covariates</b>                           |       |       |      |       |      |
| Falls                                                       | 35·5% | 36·9% | 0·03 | 35·4% | 0·00 |
| Fractures                                                   | 10·6% | 10·7% | 0·00 | 10·4% | 0·01 |
| Home Health Care                                            | 40·3% | 44·7% | 0·09 | 40·2% | 0·00 |
| Syncope                                                     | 15·8% | 17·4% | 0·04 | 15·9% | 0·00 |
| Walker Use                                                  | 6·7%  | 7·4%  | 0·03 | 6·8%  | 0·01 |
| Wheelchair Use                                              | 17·9% | 17·5% | 0·01 | 17·8% | 0·00 |
| Home Oxygen                                                 | 3·9%  | 5·2%  | 0·07 | 3·8%  | 0·01 |
| Indwelling urinary catheter                                 | 1·5%  | 2·1%  | 0·04 | 1·6%  | 0·00 |
| Urinary Incontinence                                        | 17·7% | 17·9% | 0·01 | 17·7% | 0·00 |
| Urinary Tract Infection                                     | 41·2% | 43·1% | 0·04 | 41·1% | 0·00 |
| <b>Health Care Utilization</b>                              |       |       |      |       |      |
| Number of Days In Nursing Home, Past 0-365 Days             |       |       |      |       |      |
| 0 Day                                                       | 74·7% | 73·1% | 0·04 | 74·8% | 0·00 |
| 1 - 30 Days                                                 | 5·4%  | 8·0%  | 0·11 | 5·3%  | 0·00 |
| 31 - 90 Days                                                | 5·6%  | 6·2%  | 0·02 | 5·6%  | 0·00 |
| 91 - 180 Days                                               | 2·1%  | 2·8%  | 0·04 | 2·2%  | 0·00 |
| More than 180 Days                                          | 12·1% | 10·0% | 0·07 | 12·0% | 0·00 |
| Number of Days In Skilled Nursing Facility, Past 0-365 Days |       |       |      |       |      |
| 0 Day                                                       | 84·9% | 82·4% | 0·07 | 84·9% | 0·00 |
| 1 - 30 Days                                                 | 6·1%  | 7·9%  | 0·07 | 6·2%  | 0·01 |
| 31 - 90 Days                                                | 7·0%  | 7·1%  | 0·01 | 6·9%  | 0·00 |
| More than 90 Days                                           | 2·1%  | 2·6%  | 0·03 | 2·0%  | 0·00 |
| Hospitalizations, Past 0-30 Days                            |       |       |      |       |      |
| 0 Visits                                                    | 97·4% | 92·4% | 0·23 | 97·4% | 0·00 |
| 1+ Visit                                                    | 2·6%  | 7·6%  | 0·23 | 2·6%  | 0·00 |
| Hospitalizations, Past 31-365 Days                          |       |       |      |       |      |
| 0 Visits                                                    | 71·1% | 65·8% | 0·11 | 71·0% | 0·00 |
| 1 Visit                                                     | 18·3% | 19·8% | 0·04 | 18·4% | 0·00 |
| 2 Visits                                                    | 6·5%  | 8·6%  | 0·08 | 6·4%  | 0·00 |
| 3+ Visits                                                   | 4·0%  | 5·8%  | 0·08 | 4·2%  | 0·01 |

|                                                         |       |       |      |       |      |
|---------------------------------------------------------|-------|-------|------|-------|------|
| ER Visits, Past 0-365 Days                              |       |       |      |       |      |
| 0 Visits                                                | 47.1% | 42.7% | 0.09 | 47.2% | 0.00 |
| 1 Visit                                                 | 27.2% | 26.7% | 0.01 | 27.2% | 0.00 |
| 2 Visits                                                | 12.7% | 13.8% | 0.03 | 12.6% | 0.00 |
| 3 Visits                                                | 6.0%  | 7.4%  | 0.05 | 6.1%  | 0.00 |
| 4+ Visits                                               | 6.9%  | 9.4%  | 0.09 | 6.9%  | 0.00 |
| Doctor's Office Visits, Past 0-365 Days                 |       |       |      |       |      |
| 0-10 Visits                                             | 43.2% | 44.4% | 0.02 | 43.2% | 0.00 |
| 11-20 Visits                                            | 40.7% | 37.9% | 0.06 | 40.7% | 0.00 |
| 21-30 Visits                                            | 12.9% | 12.7% | 0.00 | 12.9% | 0.00 |
| >30 Visits                                              | 3.2%  | 5.0%  | 0.09 | 3.2%  | 0.00 |
| Neurologist Visit, Past 0-90 Days                       |       |       |      |       |      |
| 0                                                       | 49.7% | 58.6% | 0.18 | 49.2% | 0.01 |
| 1                                                       | 21.7% | 17.9% | 0.10 | 21.9% | 0.00 |
| 2                                                       | 12.2% | 10.0% | 0.07 | 12.1% | 0.00 |
| 3+                                                      | 16.4% | 13.5% | 0.08 | 16.8% | 0.01 |
| <b>QT Drug Prescription Covering the Index Date</b>     | 33.7% | 38.1% | 0.09 | 33.5% | 0.01 |
| <b>L-dopa Usage</b>                                     |       |       |      |       |      |
| Number of Days Covered by L-Dopa, Past 0-365 Days       |       |       |      |       |      |
| 1-90                                                    | 5.1%  | 11.4% | 0.23 | 5.0%  | 0.00 |
| 91-180                                                  | 5.7%  | 9.1%  | 0.13 | 5.7%  | 0.00 |
| 181-270                                                 | 16.0% | 16.7% | 0.02 | 15.9% | 0.00 |
| 271-365                                                 | 73.3% | 62.8% | 0.23 | 73.5% | 0.00 |
| Total L-Dopa Dose (1000 mg)                             |       |       |      |       |      |
| (0, 100]                                                | 21.1% | 34.0% | 0.29 | 20.7% | 0.01 |
| (100, 200]                                              | 33.6% | 31.7% | 0.04 | 33.7% | 0.00 |
| (200, 300]                                              | 22.3% | 18.5% | 0.10 | 22.6% | 0.01 |
| (300, 400]                                              | 11.9% | 8.1%  | 0.13 | 11.9% | 0.00 |
| > 400                                                   | 11.1% | 7.6%  | 0.12 | 11.1% | 0.00 |
| Average L-Dopa Daily Dose <sup>d</sup> (mg)             |       |       |      |       |      |
| (0, 200]                                                | 2.4%  | 4.7%  | 0.12 | 2.4%  | 0.00 |
| (200, 400]                                              | 23.6% | 32.9% | 0.21 | 23.0% | 0.01 |
| (400, 600]                                              | 22.4% | 21.6% | 0.02 | 22.6% | 0.01 |
| (600, 800]                                              | 18.9% | 16.5% | 0.06 | 19.0% | 0.00 |
| > 800                                                   | 32.7% | 24.2% | 0.19 | 33.0% | 0.01 |
| <b>Opioids Drug Utilization</b>                         |       |       |      |       |      |
| Number of Days Covered by Opioid Drugs, Past 0-365 Days |       |       |      |       |      |
| 0 Day                                                   | 65.9% | 62.1% | 0.08 | 66.5% | 0.01 |
| 1 - 30 Days                                             | 19.1% | 19.7% | 0.02 | 18.9% | 0.00 |

|                                                                |       |       |      |       |      |
|----------------------------------------------------------------|-------|-------|------|-------|------|
| 31 - 180 Days                                                  | 9.4%  | 10.3% | 0.03 | 9.1%  | 0.01 |
| More than 180 Days                                             | 5.6%  | 7.9%  | 0.09 | 5.5%  | 0.00 |
| <b>Medications</b>                                             |       |       |      |       |      |
| <b>Parkinson's Disease Medication</b>                          |       |       |      |       |      |
| Dopamine Agonist                                               | 35.0% | 25.5% | 0.21 | 35.4% | 0.01 |
| MAO B inhibitors                                               | 20.7% | 11.8% | 0.24 | 21.4% | 0.02 |
| Amantadine                                                     | 12.9% | 9.6%  | 0.10 | 13.2% | 0.01 |
| Anticholinergics                                               | 2.2%  | 2.1%  | 0.01 | 2.2%  | 0.00 |
| <b>General</b>                                                 |       |       |      |       |      |
| Estrogen replacement                                           | 0.7%  | 0.9%  | 0.02 | 0.7%  | 0.00 |
| H2-antagonists                                                 | 8.3%  | 10.3% | 0.07 | 8.2%  | 0.00 |
| NSAIDs                                                         | 18.0% | 17.9% | 0.00 | 17.8% | 0.01 |
| Proton pump inhibitors                                         | 28.9% | 34.2% | 0.11 | 28.8% | 0.00 |
| Thyroid replacement                                            | 20.5% | 21.9% | 0.03 | 20.3% | 0.00 |
| <b>Diabetes medications</b>                                    |       |       |      |       |      |
| Insulin                                                        | 4.4%  | 6.9%  | 0.11 | 4.3%  | 0.01 |
| Metformin                                                      | 8.9%  | 11.0% | 0.07 | 8.9%  | 0.00 |
| Sulfonylureas                                                  | 4.2%  | 5.3%  | 0.05 | 4.2%  | 0.00 |
| Other DM Drug                                                  | 3.4%  | 5.1%  | 0.08 | 3.4%  | 0.00 |
| <b>Cardiovascular</b>                                          |       |       |      |       |      |
| ACEI/ARBs                                                      | 33.6% | 38.1% | 0.09 | 33.5% | 0.00 |
| Antiarrhythmics                                                | 2.1%  | 3.9%  | 0.10 | 2.1%  | 0.00 |
| Anticoagulants (oral)                                          | 11.6% | 13.7% | 0.06 | 11.4% | 0.00 |
| Anticoagulants (injectable)                                    | 1.1%  | 1.3%  | 0.03 | 1.0%  | 0.00 |
| Antiplatelets                                                  | 8.6%  | 11.4% | 0.09 | 8.5%  | 0.00 |
| Beta blockers                                                  | 31.5% | 37.8% | 0.13 | 31.3% | 0.00 |
| Calcium channel blockers                                       | 20.9% | 24.0% | 0.08 | 20.7% | 0.00 |
| Digoxin                                                        | 2.0%  | 2.4%  | 0.03 | 1.9%  | 0.01 |
| Diuretics (Loop)                                               | 18.3% | 20.9% | 0.07 | 18.2% | 0.00 |
| Diuretics (Potassium-sparing)                                  | 4.0%  | 5.0%  | 0.05 | 4.0%  | 0.00 |
| Diuretics (Thiazides)                                          | 11.9% | 13.8% | 0.06 | 11.9% | 0.00 |
| Drugs for hypotension                                          | 13.4% | 8.7%  | 0.15 | 13.6% | 0.00 |
| Nitrates                                                       | 6.1%  | 8.1%  | 0.08 | 6.1%  | 0.00 |
| Statins                                                        | 45.3% | 49.7% | 0.09 | 45.1% | 0.01 |
| Fibrates                                                       | 2.4%  | 2.5%  | 0.01 | 2.3%  | 0.00 |
| <b>Medications for Treatment of Neuropsychiatric Disorders</b> |       |       |      |       |      |
| Anti-dementia drugs                                            | 45.4% | 42.2% | 0.06 | 45.4% | 0.00 |
| Anti-anxiety drugs                                             | 22.6% | 31.7% | 0.21 | 22.5% | 0.00 |
| Clonazepam                                                     | 14.0% | 14.3% | 0.01 | 13.9% | 0.00 |
| Hypnotics                                                      | 4.8%  | 8.5%  | 0.15 | 4.7%  | 0.00 |
| Mood stabilizers                                               | 1.6%  | 3.6%  | 0.12 | 1.5%  | 0.01 |

|                                               |       |       |      |       |      |
|-----------------------------------------------|-------|-------|------|-------|------|
| Anti-depressants                              | 59·4% | 67·0% | 0·16 | 59·2% | 0·00 |
| Drugs for daytime sleepiness                  | 1·2%  | 0·9%  | 0·03 | 1·3%  | 0·01 |
| <b>Charlson Comorbidity Index (CCI)</b>       |       |       |      |       |      |
| 0                                             | 12·9% | 9·6%  | 0·11 | 13·2% | 0·01 |
| 1                                             | 19·6% | 16·9% | 0·07 | 19·7% | 0·00 |
| 2                                             | 19·8% | 18·3% | 0·04 | 19·7% | 0·00 |
| 3                                             | 16·9% | 15·5% | 0·04 | 16·7% | 0·01 |
| 4                                             | 10·8% | 12·7% | 0·06 | 10·7% | 0·00 |
| >=5                                           | 20·0% | 27·2% | 0·17 | 20·1% | 0·00 |
| <b>Frailty Score (past 0 - 183 days) Mean</b> | 0·31  | 0·35  | 0·21 | 0·31  | 0·01 |
| <b>Antihistamine Usage</b>                    | 5·4%  | 7·3%  | 0·08 | 5·4%  | 0·00 |

<sup>a</sup>Denotes the weighted pseudo-population created by applying IPTW-ATT weights for the atypical antipsychotics cohort

<sup>b</sup>The LIS is a subsidy paid by the federal government to the prescription drug plan in which an eligible Medicare beneficiary enrolls. The income and resources of a beneficiary are considered in determining their eligibility for the subsidy.

<sup>c</sup>The ADI represents a geographic-area based measure of the socioeconomic deprivation experienced by a neighborhood. The scale is on a national rank from 0 to 100 and higher index values represent higher levels of deprivation. An ADI national rank of 50 was used as the cut point for low and high ADI categories.

<sup>d</sup>Average daily dose is calculated as total L-Dopa dose/number of days covered with L-Dopa during lookback

**TABLE S2. Number of prescriptions of 16 most common QT-prolonging drugs<sup>a</sup> during follow-up in the pimavanserin and atypical antipsychotics cohorts**

| QT Prolonging Drug                                     | Prescriptions |       |                         |       |
|--------------------------------------------------------|---------------|-------|-------------------------|-------|
|                                                        | Pimavanserin  |       | Atypical Antipsychotics |       |
|                                                        | #             | %     | #                       | %     |
| Total Number of QT Drug Prescriptions during Follow-up | 7,693         |       | 47,140                  |       |
| Donepezil                                              | 3,334         | 43.3% | 19,900                  | 42.2% |
| Escitalopram                                           | 1,952         | 25.4% | 9,322                   | 19.8% |
| Citalopram                                             | 858           | 11.2% | 6,212                   | 13.2% |
| Ciprofloxacin                                          | 351           | 4.6%  | 2,537                   | 5.4%  |
| Ondansetron                                            | 253           | 3.3%  | 1,861                   | 3.9%  |
| Azithromycin                                           | 201           | 2.6%  | 1,221                   | 2.6%  |
| Levofloxacin                                           | 188           | 2.4%  | 1,518                   | 3.2%  |
| Quinidine                                              | 176           | 2.3%  | 686                     | 1.5%  |
| Amiodarone                                             | 106           | 1.4%  | 1,275                   | 2.7%  |
| Fluconazole                                            | 72            | 0.9%  | 673                     | 1.4%  |
| Sotalol                                                | 58            | 0.8%  | 456                     | 1.0%  |
| Hydroxychloroquine                                     | 51            | 0.7%  | 287                     | 0.6%  |
| Cilostazol                                             | 20            | 0.3%  | 297                     | 0.6%  |
| Flecainide                                             | 15            | 0.2%  | 197                     | 0.4%  |
| Haloperidol                                            | 15            | 0.2%  | 209                     | 0.4%  |
| Methadone                                              | 14            | 0.2%  | 199                     | 0.4%  |

<sup>a</sup>Table only displays the 16 most commonly prescribed QT-prolonging drugs during follow-up in the study population. The other drugs not displayed in the table, but contributing to the 'Total Number of QT Drug Prescriptions during Follow-Up' are disopyramide, dronedarone, clarithromycin, erythromycin, dofetilide, moxifloxacin, thioridazine, pimoziide, anagrelide, and chlorpromazine.

**TABLE S3. Number of beneficiaries meeting study eligibility criteria at various steps in the cohort development process**

| <b>Study Eligibility Criteria</b>                                                                                   | <b>Pimavanserin</b> | <b>Atypical Antipsychotics</b> |
|---------------------------------------------------------------------------------------------------------------------|---------------------|--------------------------------|
| Received pimavanserin or oral atypical antipsychotics prescription between April 29, 2016 and March 30, 2019        | 8,576               | 3,744,238                      |
| Had continuous Part A/B/D enrollment in 365 days before and the day after index date                                | 5,308               | 2,188,672                      |
| Received Parkinson's Disease (PD) diagnosis and at least one Levodopa prescription in 365 days before index date    | 4,820               | 74,260                         |
| Age 65+ and did not receive pimavanserin or any typical or atypical antipsychotic in 365 days before index date     | 3,871               | 28,302                         |
| Not in hospital or hospice on index date and did not have a hospice stay in the 365 days before index               | 3,631               | 25,442                         |
| Not enrolled in Medicare with ESRD and did not have dialysis in 365 days before index date                          | 3,576               | 22,817                         |
| No diagnoses of schizophrenia in 365 days before index                                                              | 3,535               | 22,297                         |
| No skilled nursing facility (SNF) stay in the 30 days before index                                                  | 3,232               | 18,470                         |
| Only in one cohort on index date and did not have prescriptions for different atypical antipsychotics on index date | 3,227               | 18,445                         |
| Alive through the index date                                                                                        | <b>3,227</b>        | <b>18,442</b>                  |



**FIGURE S1. Schoenfeld residuals<sup>a</sup> plot for overall Cox proportional hazards regression**

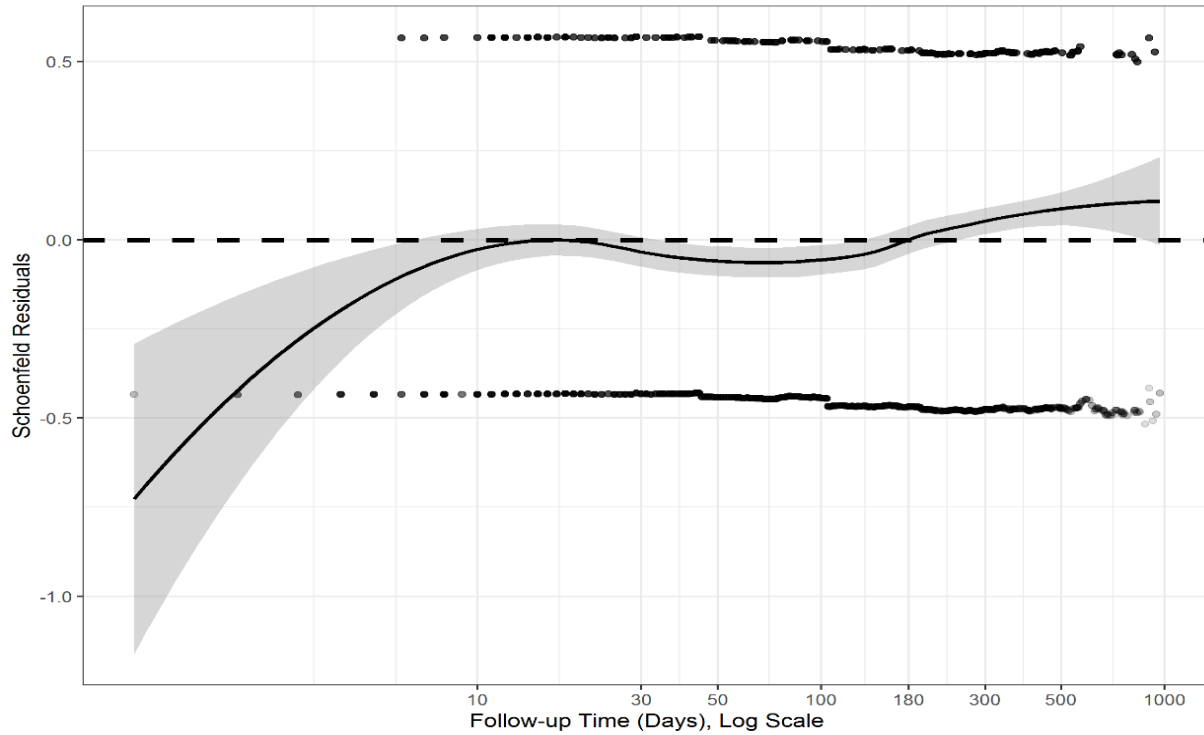

<sup>a</sup>The Schoenfeld residuals examining the PH assumption of the treatment group are shown as the black dots -- the positive dots (>0) representing the residuals in pimavanserin group and the negative dots (<0) representing the residuals in the atypical antipsychotics group. The Schoenfeld residual<sup>b</sup> for a subject was calculated as the difference between the value of the treatment group (1 for a pimavanserin user and 0 for an atypical antipsychotics user) and the weighted average of the treatment group in a risk set, at each failure time. The solid black line is the fitted smoothing spline of the Schoenfeld residuals over time with its 95% confidence interval shown as the grey band. A plot where the fitted spline deviates remarkably from the dashed black line indicates that the proportional hazard assumption is violated.

**TABLE S4. Distribution of censoring reasons, by cohort**

| Censoring Reason                           | Pimavanserin    |               | Atypical Antipsychotics |               |
|--------------------------------------------|-----------------|---------------|-------------------------|---------------|
|                                            | No. of Patients | % of Patients | No. of Patients         | % of Patients |
| <b>Total Eligible Population</b>           | <b>3,227</b>    |               | <b>18,442</b>           |               |
| Death                                      | 207             | 6.4%          | 1,752                   | 9.5%          |
| Disenrollment                              | 83              | 2.6%          | 395                     | 2.1%          |
| Receiving Typical Antipsychotics           | 13              | 0.4%          | 212                     | 1.1%          |
| Receiving Clozapine                        | 16              | 0.5%          | 38                      | 0.2%          |
| Receiving Non-Oral Atypical Antipsychotics | 2               | 0.1%          | 18                      | 0.1%          |
| End of Study Period                        | 614             | 19.0%         | 3,399                   | 18.4%         |
| Switching Treatment*                       | 447             | 13.9%         | 690                     | 3.7%          |
| Stopping Treatment**                       | 1,845           | 57.2%         | 11,938                  | 64.7%         |

\*Defined as a patient with pimavanserin as their index prescription receiving an atypical antipsychotic or a patient with an atypical antipsychotic as their index prescription receiving pimavanserin

\*\*Defined as a gap in days supply from the end of the previous prescription to the start of the subsequent prescription exceeding 14 days

## References

1. Austin PC. An Introduction to Propensity Score Methods for Reducing the Effects of Confounding in Observational Studies. *Multivariate Behav Res.* 2011;46(3):399-424. doi:10.1080/00273171.2011.568786
2. Austin, P., & Stuart, E. (2015). Moving towards best practice when using inverse probability of treatment weighting (IPTW) using the propensity score to estimate causal treatment effects in observational studies. *Statistics In Medicine*, 34(28), 3661-3679. doi: 10.1002/sim.6607
3. Schoenfeld, D. A. (1982). "Partial Residuals for the Proportional Hazards Regression Model." *Biometrika* 69:239–241.
